# Supplementary material
Source: PubMed Central journal article supplement (PMC2978555)

## Supplementary data

### **Interleukin-7 induced Stat-5 acts in synergy with Flt-3 signaling to stimulate expansion of hematopoietic progenitor cells.**

**Josefine Åhsberg, Panagiotis Tsapogas, Hong Qian, Jenny Zetterblad, Sasan Zandi, Robert Månsson, Jan-Ingvar Jönsson and Mikael Sigvardsson#.**

Department of Clinical and Experimental Medicine, Experimental Hematopoiesis Unit, Faculty for Health Sciences, 58185 Linköping Sweden.

Running head: Direct synergistic functions between FL and IL-7.

# Corresponding author: E-mail; [mikael.sigvardsson@med.lu.se](mailto:mikael.sigvardsson@med.lu.se).

Tel; 46-(0)708-320120, Fax: 46-(0)13-221375.

### **Supplementary Figure 1. Stimulation of BaF3Flt-3, Il-7R cells with Flt-3 and Il-7**

**does not induce expression of anti-apoptotic genes.** Expression of the apoptosis related genes *Bcl-2*, *Bcl-xl* and *Mcl-1* was evaluated by qPCR after stimulation of BaF3<sup>Flt-3, Il-7R</sup> cells with 2 ng/ml Flt-3L and 2 ng/ml Il-7. Gene expression levels in cytokine deprived, non-stimulated cells at 24 hours were set to 1 and used for relative comparison. Each column is derived from triplicate data and represents one representative out of two independent experiments. Error bars represent experimental error mean.

### **Supplementary Figure 2. Flt-3L and Il-7 act in synergy to stimulate expansion of**

**CLPs.** CLPs were plated in triplicate at 8000 cells/well in a 96-well plate for each of the indicated conditions (10 ng/ml of each cytokine). At 24, 48 and 70 hours equal volumes from all individual wells were analyzed for CFSE-staining and the absolute number of cells/well was calculated. Data is from one representative out of two separate sorting experiments. Error bars represent SD from three individual wells.

**Supplementary Figure 3. Inhibition of the MAPK signaling can prevent the Flt-3 mediated reduction of pro-apoptotic genes in BaF3 cells.** Expression of the apoptosis related genes *Bim* and *Bad* was evaluated by qPCR after stimulation of BaF3<sup>caStat-5,Flt-3</sup> cells with 5 ng/ml Flt-3L in combination with MEK1/2 inhibitor U0126. Gene expression levels in vehicle control cells at 24 hours were set to 1 and used for relative comparison. Each column is derived from triplicate data and represents one representative out of two independent experiments. Error bars represent experimental error mean.

A

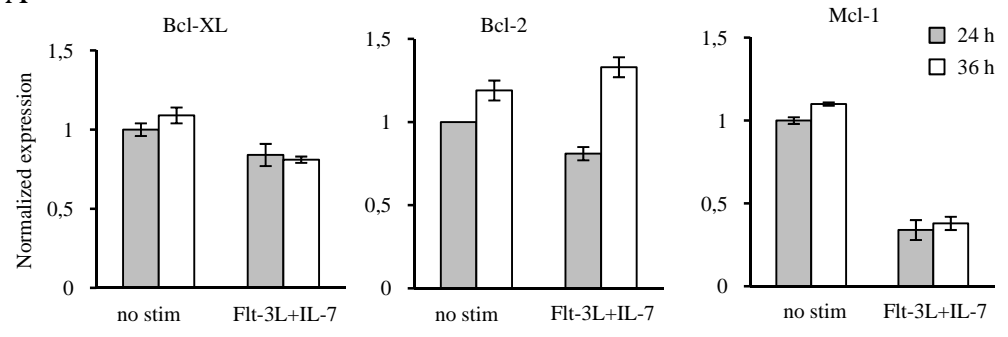

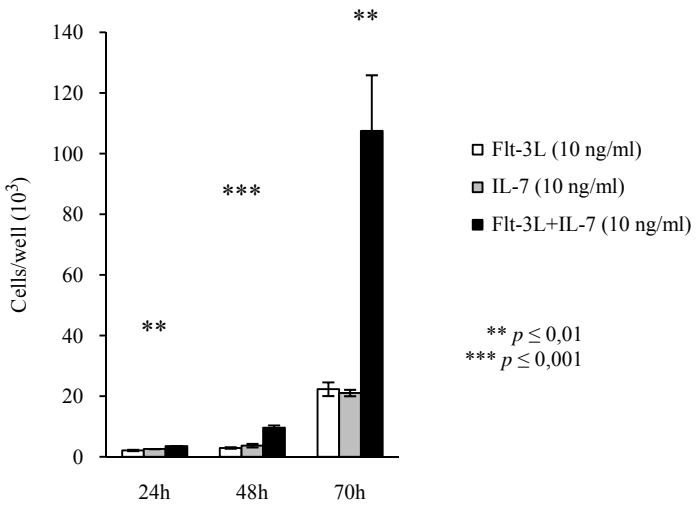

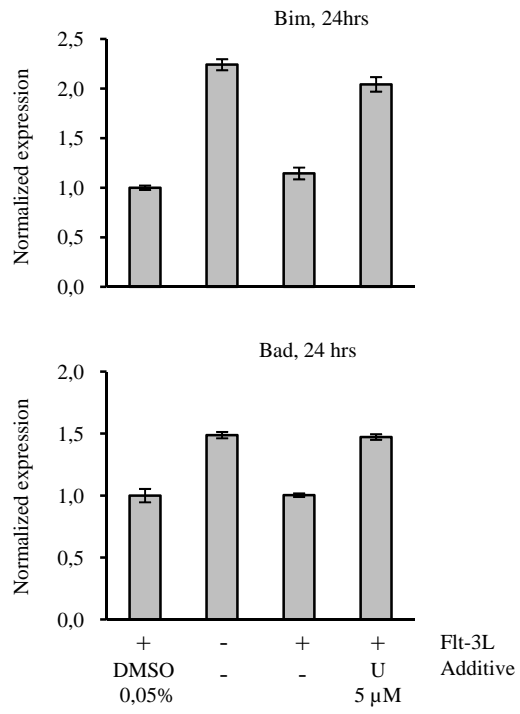

Supplement: supp_M110.155531_jbc.M110.155531-1.pdf [file supp_M110.155531_jbc.M110.155531-1.pdf]
